# Supplementary material for: On the Estimation of Heritability with Family-Based and Population-Based Samples
Source: Hindawi journal article supplement (doi:10.1155/2015/671349), 2015-01-01
Supplement: f1 [file 671349.f1.pdf]

## SUPPLEMENTARY MATERIALS

**Table S1 Correlation between Type 2 diabetes status and various traits related to cardiovascular disease in the KARE cohort.**

| <b>Trait</b>  | <b>correlation</b> |
|---------------|--------------------|
| <b>Height</b> | 0.017              |
| <b>BMI</b>    | 0.096              |
| <b>Log TG</b> | 0.154              |
| <b>TCHL</b>   | 0.114              |
| <b>HDL</b>    | -0.047             |
| <b>LDL</b>    | 0.070              |
| <b>SBP</b>    | 0.112              |
| <b>DBP</b>    | 0.076              |

**Table S2 Estimates of heritability for height.** Heritability of height in three Korean populations were estimated. S.A.G.E. estimates the heritability with FRM and GCTA does it with GRM. The additive polygenic variance, random error variance and phenotypic variance are denoted by  $\sigma_a^2$ ,  $\sigma^2$  and  $\sigma_p^2$ , respectively. Contrary to GCTA, S.A.G.E. can also estimate the relative proportion of variance explained by common sibling effects and common marital effects, and those are denoted by  $\sigma_m^2$  and  $\sigma_s^2$ , respectively. The standard errors of each estimate are shown in parenthesis. If the variance components are not estimable, the results are denoted as NA.

| Cohort              | Family          |                |             |                 |                |             | Population      |                 |                | ALL            |
|---------------------|-----------------|----------------|-------------|-----------------|----------------|-------------|-----------------|-----------------|----------------|----------------|
|                     | HTK             |                | S.A.G.E.    | ASF             |                | KARE        |                 | GCTA w/o cutoff | GCTA w/ cutoff |                |
| Program             | GCTA w/o cutoff | GCTA w/ cutoff |             | GCTA w/o cutoff | GCTA w/ cutoff | S.A.G.E.    | GCTA w/o cutoff |                 |                | GCTA w/ cutoff |
| $h^2$ (s.e.)        | 0.76(0.04)      | 0.78(0.46)     | 0.81(0.06)  | 0.66(0.07)      | 0.79(0.64)     | 0.67(0.09)  | 0.36(0.03)      | 0.32(0.04)      | 0.60(0.02)     | 0.32(0.04)     |
| $\sigma_a^2$ (s.e.) | 21.81(1.71)     | 22.30(13.38)   | 23.31(2.21) | 19.86(2.87)     | 23.60(21.49)   | 19.14(3.12) | 10.29(1.01)     | 8.98(1.22)      | 17.34(0.75)    | 9.12(1.06)     |
| $\sigma^2$ (s.e.)   | 6.86(1.04)      | 6.32(13.15)    | 0.50(2.87)  | 10.34(1.90)     | 6.33(18.69)    | 3.84(3.55)  | 18.03(0.96)     | 19.37(1.19)     | 11.51(0.57)    | 19.24(1.03)    |
| $\sigma_m^2$ (s.e.) | NA              | NA             | 4.83(2.05)  | NA              | NA             | 3.05(2.25)  | NA              | NA              | NA             | NA             |
| $\sigma_s^2$ (s.e.) | NA              | NA             | 0.28(0.91)  | NA              | NA             | 2.49(1.54)  | NA              | NA              | NA             | NA             |
| $\sigma_p^2$ (s.e.) | 28.67(1.10)     | 28.62(1.53)    | 28.92(1.15) | 30.20(1.75)     | 29.93(3.57)    | 28.51(1.63) | 28.32(0.43)     | 28.35(0.48)     | 28.85(0.41)    | 28.36(0.45)    |
| $n$                 | 1,791           | 717            | 1,799       | 784             | 342            | 784         | 8,842           | 7,178           | 11,421         | 8,172          |

**Table S3 Estimates of heritability for BMI.** Heritability of BMI in three Korean populations were estimated. S.A.G.E. estimates the heritability with FRM and GCTA does it with GRM. The additive polygenic variance, random error variance and phenotypic variance are denoted by  $\sigma_a^2$ ,  $\sigma^2$  and  $\sigma_p^2$ , respectively. Contrary to GCTA, S.A.G.E. can also estimate the relative proportion of variance explained by common sibling effects and common marital effects, and those are denoted by  $\sigma_m^2$  and  $\sigma_s^2$ , respectively. The standard errors of each estimate are shown in parenthesis. If the variance components are not estimable, the results are denoted as NA.

| Cohort              | Family          |                |            |                 |                |             | Population      |                 | ALL            |                |
|---------------------|-----------------|----------------|------------|-----------------|----------------|-------------|-----------------|-----------------|----------------|----------------|
|                     | HTK             |                | S.A.G.E.   | ASF             |                | KARE        |                 | GCTA w/o cutoff | GCTA w/ cutoff |                |
| Program             | GCTA w/o cutoff | GCTA w/ cutoff |            | GCTA w/o cutoff | GCTA w/ cutoff | S.A.G.E.    | GCTA w/o cutoff |                 |                | GCTA w/ cutoff |
| $h^2$ (s.e.)        | 0.43(0.05)      | 0(0.43)        | 0.38(0.06) | 0.41(0.08)      | 0.95(0.65)     | 0.43(0.09)  | 0.18(0.03)      | 0.15(0.04)      | 0.32(0.02)     | 0.14(0.04)     |
| $\sigma_a^2$ (s.e.) | 4.31(0.55)      | 0(4.31)        | 3.73(0.68) | 4.53(1.04)      | 10.84(8.57)    | 4.53(1.03)  | 1.71(0.32)      | 1.43(0.4)       | 3.14(0.23)     | 1.32(0.34)     |
| $\sigma^2$ (s.e.)   | 5.77(0.46)      | 9.96(4.33)     | 4.70(0.91) | 6.55(0.83)      | 0.63(7.43)     | 5.22(1.52)  | 7.84(0.33)      | 8.21(0.41)      | 6.71(0.22)     | 8.27(0.36)     |
| $\sigma_m^2$ (s.e.) | NA              | NA             | 0.43(0.71) | NA              | NA             | 0.73(1.04)  | NA              | NA              | NA             | NA             |
| $\sigma_s^2$ (s.e.) | NA              | NA             | 0.94(0.42) | NA              | NA             | NA          | NA              | NA              | NA             | NA             |
| $\sigma_p^2$ (s.e.) | 10.08(0.36)     | 9.96(0.53)     | 9.81(0.36) | 11.08(0.61)     | 11.47(1.41)    | 10.48(0.56) | 9.56(0.14)      | 9.63(0.16)      | 9.86(0.13)     | 9.58(0.15)     |
| <i>n</i>            | 1,789           | 717            | 1,789      | 784             | 342            | 784         | 8,838           | 7,177           | 11,415         | 8,171          |

**Table S4 Estimates of heritability for log(TG).** Heritability of log(TG) in three Korean populations were estimated. S.A.G.E. estimates the heritability with FRM and GCTA does it with GRM. The additive polygenic variance, random error variance and phenotypic variance are denoted by  $\sigma_a^2$ ,  $\sigma^2$  and  $\sigma_p^2$ , respectively. Contrary to GCTA, S.A.G.E. can also estimate the relative proportion of variance explained by common sibling effects and common marital effects, and those are denoted by  $\sigma_m^2$  and  $\sigma_s^2$ , respectively. The standard errors of each estimate are shown in parenthesis. If the variance components are not estimable, the results are denoted as NA.

| Cohort              | Family          |                |            |                 |                |            | Population      |                 | ALL            |                |
|---------------------|-----------------|----------------|------------|-----------------|----------------|------------|-----------------|-----------------|----------------|----------------|
|                     | HTK             |                | S.A.G.E.   | ASF             |                | KARE       |                 | GCTA w/o cutoff | GCTA w/ cutoff |                |
| Program             | GCTA w/o cutoff | GCTA w/ cutoff |            | GCTA w/o cutoff | GCTA w/ cutoff | S.A.G.E.   | GCTA w/o cutoff |                 |                | GCTA w/ cutoff |
| $h^2$ (s.e.)        | 0.37(0.05)      | 0.16(0.42)     | 0.29(0.07) | 0.27(0.08)      | 0.39(0.66)     | 0.27(0.10) | 0.19(0.03)      | 0.21(0.04)      | 0.24(0.02)     | 0.19(0.04)     |
| $\sigma_a^2$ (s.e.) | 0.10(0.02)      | 0.05(0.13)     | 0.08(0.02) | 0.07(0.02)      | 0.10(0.18)     | 0.07(0.03) | 0.05(0.01)      | 0.05(0.01)      | 0.06(0.01)     | 0.05(0.01)     |
| $\sigma^2$ (s.e.)   | 0.17(0.01)      | 0.25(0.13)     | 0.17(0.01) | 0.20(0.02)      | 0.15(0.15)     | 0.15(0.04) | 0.19(0.01)      | 0.19(0.01)      | 0.19(0.01)     | 0.2(0.01)      |
| $\sigma_m^2$ (s.e.) | NA              | NA             | NA         | NA              | NA             | 0.02(0.03) | NA              | NA              | NA             | NA             |
| $\sigma_s^2$ (s.e.) | NA              | NA             | 0.03(0.01) | NA              | NA             | 0.02(0.02) | NA              | NA              | NA             | NA             |
| $\sigma_p^2$ (s.e.) | 0.27(0.01)      | 0.3(0.02)      | 0.27(0.01) | 0.27(0.01)      | 0.25(0.03)     | 0.26(0.01) | 0.24(0)         | 0.24(0)         | 0.24(0.00)     | 0.24(0.00)     |
| <i>n</i>            | 1,769           | 710            | 1,765      | 776             | 339            | 776        | 8,841           | 7,177           | 11,386         | 8,164          |

**Table S5 Estimates of heritability for TCHL.** Heritability of TCHL in three Korean populations were estimated. S.A.G.E. estimates the heritability with FRM and GCTA does it with GRM. The additive polygenic variance, random error variance and phenotypic variance are denoted by  $\sigma_a^2$ ,  $\sigma^2$  and  $\sigma_p^2$ , respectively. Contrary to GCTA, S.A.G.E. can also estimate the relative proportion of variance explained by common sibling effects and common marital effects, and those are denoted by  $\sigma_m^2$  and  $\sigma_s^2$ , respectively. The standard errors of each estimate are shown in parenthesis. If the variance components are not estimable, the results are denoted as NA.

| Cohort              | Family                |                      |                |                       |                      |                 | Population            |                      |                       | ALL                  |
|---------------------|-----------------------|----------------------|----------------|-----------------------|----------------------|-----------------|-----------------------|----------------------|-----------------------|----------------------|
|                     | HTK                   |                      | S.A.G.E.       | ASF                   |                      | KARE            |                       |                      |                       |                      |
| Program             | GCTA<br>w/o<br>cutoff | GCTA<br>w/<br>cutoff |                | GCTA<br>w/o<br>cutoff | GCTA<br>w/<br>cutoff | S.A.G.E.        | GCTA<br>w/o<br>cutoff | GCTA<br>w/<br>cutoff | GCTA<br>w/o<br>cutoff | GCTA<br>w/<br>cutoff |
| $h^2$ (s.e.)        | 0.47(0.05)            | 0.58(0.44)           | 0.42(0.06)     | 0.50(0.08)            | 1.00(0.64)           | 0.48(0.10)      | 0.24(0.03)            | 0.18(0.04)           | 0.30(0.02)            | 0.14(0.04)           |
| $\sigma_a^2$ (s.e.) | 591.91(68.92)         | 790.29(607.99)       | 516.78(86.65)  | 641.03(126.02)        | 1477.97(1083.31)     | 594.55 (136.58) | 303.82(43.32)         | 226.86(53.05)        | 380.53(29.70)         | 184.49(45.92)        |
| $\sigma^2$ (s.e.)   | 667.42(54.90)         | 571.5(600.76)        | 460.95(101.97) | 645.15(94.74)         | 0.00(939.87)         | 515.27(107.30)  | 986.61(43.57)         | 1067.44(54.19)       | 901.60(28.39)         | 1115.85(47.84)       |
| $\sigma_m^2$ (s.e.) | NA                    | NA                   | 104.29(70.80)  | NA                    | NA                   | NA              | NA                    | NA                   | NA                    | NA                   |
| $\sigma_s^2$ (s.e.) | NA                    | NA                   | 151.28(49.75)  | NA                    | NA                   | 123.25(80.79)   | NA                    | NA                   | NA                    | NA                   |
| $\sigma_p^2$ (s.e.) | 1259.33(44.95)        | 1361.8(72.37)        | 1233.30(45.60) | 1286.18(72.90)        | 1477.98(179.48)      | 1233.06(68.31)  | 1290.43(19.53)        | 1294.30(21.68)       | 1282.14(17.33)        | 1300.34(20.39)       |
| $n$                 | 1,797                 | 718                  | 1,793          | 784                   | 342                  | 784             | 8,841                 | 7,177                | 11,422                | 8,172                |

**Table S6 Estimates of heritability for HDL.** Heritability of HDL in three Korean populations were estimated. S.A.G.E. estimates the heritability with FRM and GCTA does it with GRM. The additive polygenic variance, random error variance and phenotypic variance are denoted by  $\sigma_a^2$ ,  $\sigma^2$  and  $\sigma_p^2$ , respectively. Contrary to GCTA, S.A.G.E. can also estimate the relative proportion of variance explained by common sibling effects and common marital effects, and those are denoted by  $\sigma_m^2$  and  $\sigma_s^2$ , respectively. The standard errors of each estimate are shown in parenthesis. If the variance components are not estimable, the results are denoted as NA.

| Cohort              | Family          |                |               |                 |                |              | Population      |                 |                | ALL            |
|---------------------|-----------------|----------------|---------------|-----------------|----------------|--------------|-----------------|-----------------|----------------|----------------|
|                     | HTK             |                | S.A.G.E.      | ASF             |                | KARE         |                 | GCTA w/o cutoff | GCTA w/ cutoff |                |
| Program             | GCTA w/o cutoff | GCTA w/ cutoff |               | GCTA w/o cutoff | GCTA w/ cutoff | S.A.G.E.     | GCTA w/o cutoff |                 |                | GCTA w/ cutoff |
| $h^2$ (s.e.)        | 0.72(0.04)      | 0(0.44)        | 0.74(0.06)    | 0.50(0.07)      | 0.74(0.63)     | 0.52(0.09)   | 0.18(0.03)      | 0.16(0.04)      | 0.38(0.02)     | 0.15(0.04)     |
| $\sigma_a^2$ (s.e.) | 105.26(8.6)     | 0(66.16)       | 110.21(11.51) | 63.73(11.24)    | 106.88(101.72) | 58.86(11.73) | 18.15(3.41)     | 16.5(4.17)      | 42.01(2.59)    | 15.17(3.77)    |
| $\sigma^2$ (s.e.)   | 41.31(5.45)     | 151.13(66.27)  | 14.99(14.28)  | 62.48(8.46)     | 38.17(88.58)   | 35.32(14.10) | 82.63(3.5)      | 83.63(4.27)     | 68.27(2.34)    | 89.28(3.91)    |
| $\sigma_m^2$ (s.e.) | NA              | NA             | 13.14(10.03)  | NA              | NA             | 1.24(9.39)   | NA              | NA              | NA             | NA             |
| $\sigma_s^2$ (s.e.) | NA              | NA             | 9.63(5.04)    | NA              | NA             | 17.57(7.30)  | NA              | NA              | NA             | NA             |
| $\sigma_p^2$ (s.e.) | 146.57(5.54)    | 151.13(8.02)   | 147.98(5.89)  | 126.21(7.03)    | 145.06(17.03)  | 112.99(6.27) | 100.78(1.52)    | 100.14(1.68)    | 110.28(1.51)   | 104.45(1.64)   |
| <i>n</i>            | 1,791           | 715            | 1,787         | 784             | 342            | 784          | 8,841           | 7,177           | 11,416         | 8,169          |

**Table S7 Estimates of heritability for LDL.** Heritability of LDL in three Korean populations were estimated. S.A.G.E. estimates the heritability with FRM and GCTA does it with GRM. The additive polygenic variance, random error variance and phenotypic variance are denoted by  $\sigma_a^2$ ,  $\sigma^2$  and  $\sigma_p^2$ , respectively. Contrary to GCTA, S.A.G.E. can also estimate the relative proportion of variance explained by common sibling effects and common marital effects, and those are denoted by  $\sigma_m^2$  and  $\sigma_s^2$ , respectively. The standard errors of each estimate are shown in parenthesis. If the variance components are not estimable, the results are denoted as NA.

| Cohort              | Family          |                |               |                 |                 |                | Population      |                | ALL             |                |
|---------------------|-----------------|----------------|---------------|-----------------|-----------------|----------------|-----------------|----------------|-----------------|----------------|
|                     | HTK             |                | S.A.G.E.      | ASF             |                 | S.A.G.E.       | KARE            |                | GCTA w/o cutoff | GCTA w/ cutoff |
| Program             | GCTA w/o cutoff | GCTA w/ cutoff |               | GCTA w/o cutoff | GCTA w/ cutoff  |                | GCTA w/o cutoff | GCTA w/ cutoff |                 |                |
| $h^2$ (s.e.)        | 0.43(0.05)      | 1.00(0.45)     | 0.33(0.06)    | 0.47(0.08)      | 0.54(0.67)      | 0.52(0.11)     | 0.22(0.03)      | 0.16(0.04)     | 0.29(0.02)      | 0.15(0.04)     |
| $\sigma_a^2$ (s.e.) | 377.20(48.08)   | 932.96(426.29) | 291.25(62.08) | 488.50(101.10)  | 639.35(849.86)  | 518.66(128.85) | 225.08(35.58)   | 168.85(43.55)  | 292.71(24.13)   | 151.57(37.55)  |
| $\sigma^2$ (s.e.)   | 508.98(39.87)   | 0(416.46)      | 436.39(75.66) | 549.83(77.66)   | 539.27(743.94)  | 309.48(147.15) | 812.75(36.06)   | 866.91(44.61)  | 725.57(23.19)   | 877.79(38.97)  |
| $\sigma_m^2$ (s.e.) | NA              | NA             | 17.70(55.51)  | NA              | NA              | 103.76(85.81)  | NA              | NA             | NA              | NA             |
| $\sigma_s^2$ (s.e.) | NA              | NA             | 141.50(39.31) | NA              | NA              | 66.17(66.35)   | NA              | NA             | NA              | NA             |
| $\sigma_p^2$ (s.e.) | 886.18(31.40)   | 932.96(49.98)  | 886.84(32.43) | 1038.33(58.45)  | 1178.61(139.22) | 998.07(56.25)  | 1037.84(15.93)  | 1035.76(17.56) | 1018.28(13.91)  | 1029.35(16.33) |
| $n$                 | 1,791           | 715            | 1,787         | 784             | 342             | 784            | 8,578           | 6,998          | 11,156          | 7,989          |

**Table S8 Estimates of heritability for SBP.** Heritability of SBP in three Korean populations were estimated. S.A.G.E. estimates the heritability with FRM and GCTA does it with GRM. The additive polygenic variance, random error variance and phenotypic variance are denoted by  $\sigma_a^2$ ,  $\sigma^2$  and  $\sigma_p^2$ , respectively. Contrary to GCTA, S.A.G.E. can also estimate the relative proportion of variance explained by common sibling effects and common marital effects, and those are denoted by  $\sigma_m^2$  and  $\sigma_s^2$ , respectively. The standard errors of each estimate are shown in parenthesis. If the variance components are not estimable, the results are denoted as NA.

| Cohort              | Family          |                |               | Population      |                |               | ALL             |                 |                |                |
|---------------------|-----------------|----------------|---------------|-----------------|----------------|---------------|-----------------|-----------------|----------------|----------------|
|                     | HTK             |                | S.A.G.E.      | ASF             |                | KARE          |                 | GCTA w/o cutoff | GCTA w/ cutoff |                |
| Program             | GCTA w/o cutoff | GCTA w/ cutoff |               | GCTA w/o cutoff | GCTA w/ cutoff | S.A.G.E.      | GCTA w/o cutoff |                 |                | GCTA w/ cutoff |
| $h^2$ (s.e.)        | 0.37(0.05)      | 0.89(0.46)     | 0.35(0.06)    | 0.23(0.08)      | 0(0.76)        | 0.22(0.08)    | 0.22(0.03)      | 0.26(0.04)      | 0.23(0.02)     | 0.20(0.04)     |
| $\sigma_a^2$ (s.e.) | 87.87(12.76)    | 228.84(120.42) | 79.82(15.84)  | 45.21(16.38)    | 0(155.97)      | 42.00(14.98)  | 62.03(9.43)     | 74.54(11.81)    | 61.71(6.10)    | 57.85(10)      |
| $\sigma^2$ (s.e.)   | 148.45(11.09)   | 28.46(118)     | 124.22(19.50) | 151.14(15.33)   | 205.73(138)    | 147.29(15.20) | 222.16(9.56)    | 208.42(11.72)   | 212.42(6.16)   | 224.36(10.19)  |
| $\sigma_m^2$ (s.e.) | NA              | NA             | 2.47(13.91)   | NA              | NA             | NA            | NA              | NA              | NA             | NA             |
| $\sigma_s^2$ (s.e.) | NA              | NA             | 23.27(9.90)   | NA              | NA             | NA            | NA              | NA              | NA             | NA             |
| $\sigma_p^2$ (s.e.) | 236.32(8.29)    | 257.3(13.75)   | 229.78(8.31)  | 196.35(10.36)   | 205.73(24.44)  | 189.29(9.69)  | 284.19(4.30)    | 282.96(4.76)    | 274.13(3.67)   | 282.21(4.43)   |
| <b><i>n</i></b>     | 1,791           | 717            | 1,787         | 784             | 342            | 784           | 8,841           | 7,177           | 11,416         | 8,171          |



**Table S9 Estimates of heritability for DBP.** Heritability of DBP in three Korean populations were estimated. S.A.G.E. estimates the heritability with FRM and GCTA does it with GRM. The additive polygenic variance, random error variance and phenotypic variance are denoted by  $\sigma_a^2$ ,  $\sigma^2$  and  $\sigma_p^2$ , respectively. Contrary to GCTA, S.A.G.E. can also estimate the relative proportion of variance explained by common sibling effects and common marital effects, and those are denoted by  $\sigma_m^2$  and  $\sigma_s^2$ , respectively. The standard errors of each estimate are shown in parenthesis. If the variance components are not estimable, the results are denoted as NA.

| Cohort              | Family                |                      |              |                       |                      |              | Population            |                      |                       | ALL                  |
|---------------------|-----------------------|----------------------|--------------|-----------------------|----------------------|--------------|-----------------------|----------------------|-----------------------|----------------------|
|                     | HTK                   |                      | S.A.G.E.     | ASF                   |                      | S.A.G.E.     | KARE                  |                      |                       |                      |
| Program             | GCTA<br>w/o<br>cutoff | GCTA<br>w/<br>cutoff |              | GCTA<br>w/o<br>cutoff | GCTA<br>w/<br>cutoff |              | GCTA<br>w/o<br>cutoff | GCTA<br>w/<br>cutoff | GCTA<br>w/o<br>cutoff | GCTA<br>w/<br>cutoff |
| $h^2$ (s.e.)        | 0.53(0.05)            | 0.12(0.44)           | 0.60(0.06)   | 0.21(0.08)            | 0.24(0.67)           | 0.18(0.09)   | 0.21(0.03)            | 0.21(0.04)           | 0.24(0.02)            | 0.14(0.03)           |
| $\sigma_a^2$ (s.e.) | 55.52(5.97)           | 12.51(44.62)         | 62.54(7.77)  | 16.78(6.76)           | 19.34(56.18)         | 13.90(7.13)  | 25.61(4.21)           | 26.99(5.41)          | 28.78(2.75)           | 17.78(4.45)          |
| $\sigma^2$ (s.e.)   | 50.1(4.52)            | 89.96(44.69)         | 21.39(9.28)  | 63.10(6.39)           | 61.88(49.6)          | 59.24(10.17) | 98.78(4.28)           | 101.66(5.45)         | 91.12(2.73)           | 108.50(4.64)         |
| $\sigma_m^2$ (s.e.) | NA                    | NA                   | 16.95(6.85)  | NA                    | NA                   | 0.96(6.70)   | NA                    | NA                   | NA                    | NA                   |
| $\sigma_s^2$ (s.e.) | NA                    | NA                   | 3.72(3.66)   | NA                    | NA                   | 3.97(5.96)   | NA                    | NA                   | NA                    | NA                   |
| $\sigma_p^2$ (s.e.) | 105.61(3.83)          | 102.47(5.43)         | 104.60(3.94) | 79.88(4.21)           | 81.23(9.23)          | 78.07(4.01)  | 124.38(1.88)          | 128.65(2.16)         | 119.90(1.61)          | 126.28(1.98)         |
| $n$                 | 1,792                 | 717                  | 1,788        | 784                   | 342                  | 784          | 8,841                 | 7,177                | 11,417                | 8,171                |

1 **Table S10 Missing rates for each phenotype**

2  
3  
4  
5  
6  
7  
8  
9  
10  
11  
12  
13  
14  
15  
16  
17  
18  
19  
20

|               | <b>Cohort</b> |            |            |
|---------------|---------------|------------|------------|
|               | <b>KARE</b>   | <b>HTK</b> | <b>ASF</b> |
| <b>Height</b> | 0%            | 0.11%      | 0%         |
| <b>BMI</b>    | 0.05%         | 0.22%      | 0%         |
| <b>LogTG</b>  | 0.01%         | 1.56%      | 1.02%      |
| <b>TCHL</b>   | 0.01%         | 0%         | 0%         |
| <b>HDL</b>    | 0.01%         | 0.33%      | 0%         |
| <b>LDL</b>    | 2.95%         | 0.33%      | 0%         |
| <b>SBP</b>    | 0.01%         | 0.33%      | 0%         |
| <b>DBP</b>    | 0.01%         | 0.28%      | 0%         |

21 **Table S11 Empirical correlations between family members.** The mother-father, parent-offspring  
 22 and sibling correlations, and their 95% confidence intervals were estimated with FCOR in S.A.G.E.

| <b>Cohorts</b> | <b>Types</b>                  | <b>Height</b>   | <b>BMI</b>      | <b>LogTG</b>     | <b>TCHL</b>      | <b>HDL</b>      | <b>LDL</b>       | <b>SBP</b>      | <b>DBP</b>      |
|----------------|-------------------------------|-----------------|-----------------|------------------|------------------|-----------------|------------------|-----------------|-----------------|
| <b>HTK</b>     | <b>Mother –<br/>Father</b>    | 0.172<br>±0.142 | 0.212<br>±0.136 | -0.085<br>±0.149 | 0.084<br>±0.147  | 0.106<br>±0.143 | 0.069<br>±0.152  | 0.046<br>±0.153 | 0.227<br>±0.152 |
|                | <b>Parent –<br/>offspring</b> | 0.413<br>±0.063 | 0.197<br>±0.068 | 0.114<br>±0.062  | 0.169<br>±0.068  | 0.363<br>±0.064 | 0.164<br>±0.069  | 0.175<br>±0.074 | 0.297<br>±0.075 |
|                | <b>Sibling</b>                | 0.517<br>±0.056 | 0.331<br>±0.591 | 0.290<br>±0.060  | 0.367<br>±0.060  | 0.480<br>±0.058 | 0.382<br>±0.060  | 0.283<br>±0.057 | 0.374<br>±0.060 |
|                | <b>Mother –<br/>Father</b>    | 0.144<br>±0.181 | 0.075<br>±0.222 | 0.033<br>±0.209  | -0.091<br>±0.218 | 0.052<br>±0.187 | -0.007<br>±0.226 | 0.134<br>±0.179 | 0.039<br>±0.184 |
| <b>ASF</b>     | <b>Parent –<br/>offspring</b> | 0.298<br>±0.102 | 0.215<br>±0.090 | 0.118<br>±0.099  | 0.219<br>±0.090  | 0.237<br>±0.100 | 0.190<br>±0.091  | 0.161<br>±0.116 | 0.140<br>±0.108 |
|                | <b>Sibling</b>                | 0.353<br>±0.128 | 0.168<br>±0.123 | 0.245<br>±0.175  | 0.264<br>±0.129  | 0.350<br>±0.130 | 0.236<br>±0.127  | 0.177<br>±0.156 | 0.080<br>±0.115 |

23

24

25

26

27

28

29

30

31

32

33

34

35

36

37

38

39

40

41 **Figure S1** Q-Q plots for HEIGHT, BMI, LOGTG and HDL in each cohort.

42

**A.HEIGHT**

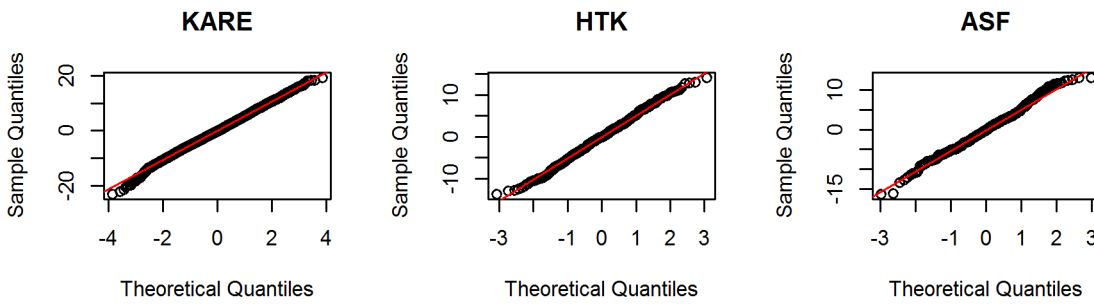

**B.BMI**

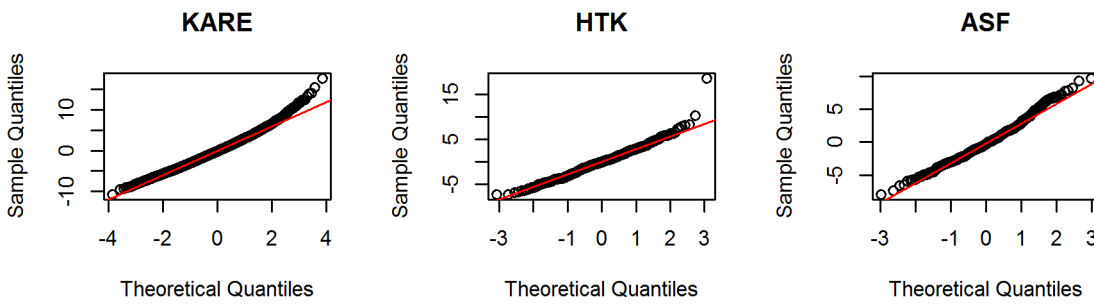

44

**C.LOGTG**

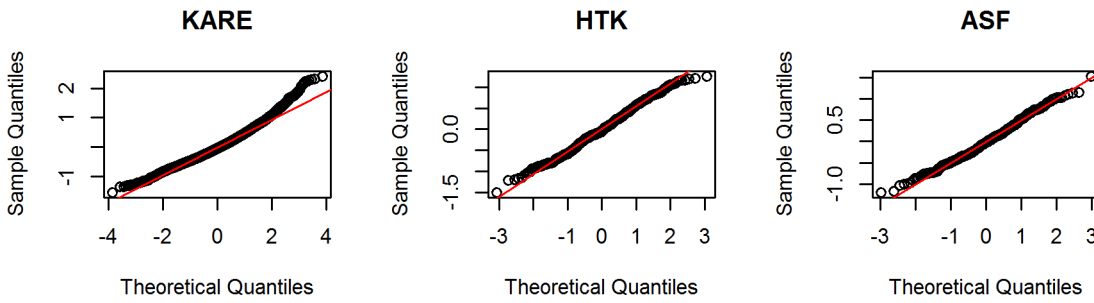

45

**D.TCHL**

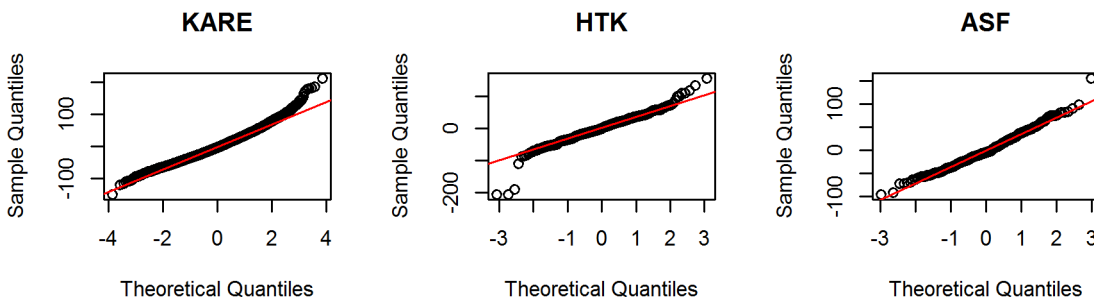

54 **Figure S2** Q-Q plots for LDL, SBP, DBP and TCHL in each cohort.  
55

**A.LDL**

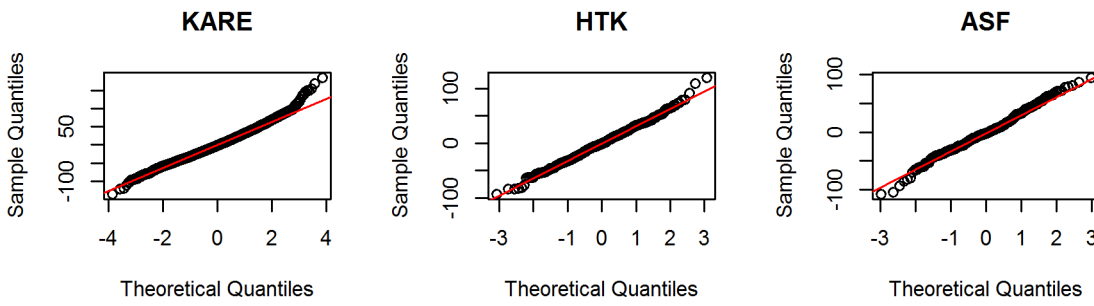

**B.SBP**

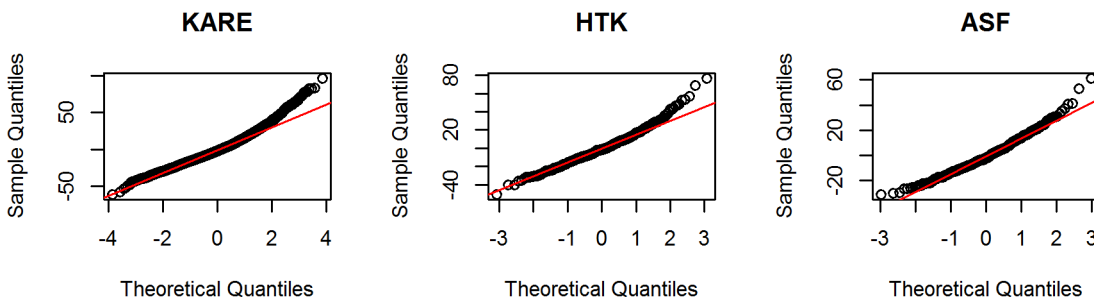

**C.DBP**

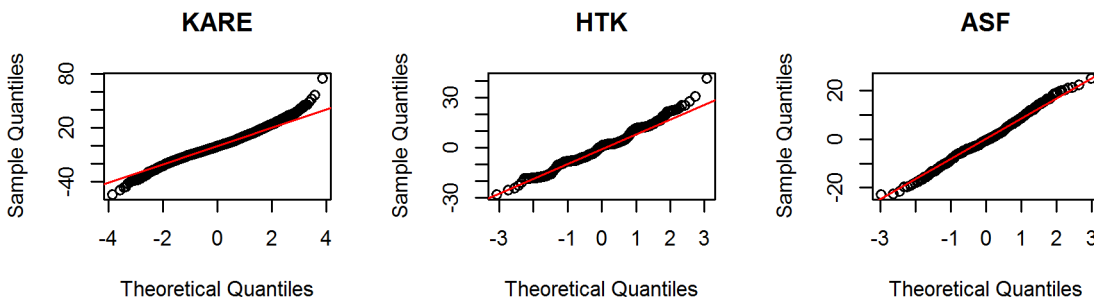

**D.TCHL**

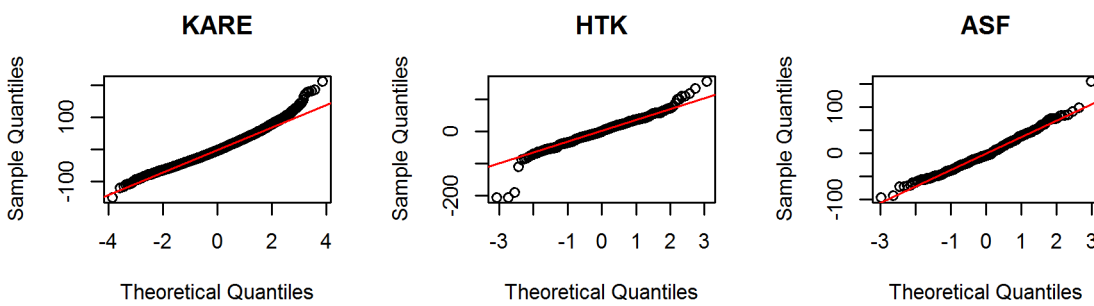

66 **Figure S3 Heritability estimates for various levels of genetic correlation with 10,000**  
 67 **individuals when  $h^2$  was set at 0.1.** We generated 5,000 pairs of individuals with 100,000  
 68 SNPs, and each box-plot was generated with results from 200 replicates. The dashed  
 69 horizontal line indicates the proportion of the total phenotypic variance explained by the  
 70 SNPs used for calculating the GRM, and the estimates of heritability with GCTA are  
 71 plotted against the correlation between family members. In **a**, all causal variants were  
 72 generated from  $U(0, 0.1)$  and 100 causal SNPs were used to estimate the GRM, in **b**, all  
 73 causal variants were generated from  $U(0, 0.1)$  and 50 causal SNPs were used, in **c**, all  
 74 causal variants were generated from  $U(0.1, 0.4)$  and 100 causal SNPs were used, and in **d**,  
 75 all causal variants were generated from  $U(0.1, 0.4)$  and 50 causal SNPs were used. The  
 76 horizontal dotted line indicates the relative proportion of variance explained by the SNPs.

**a**

**100 casual SNPs**

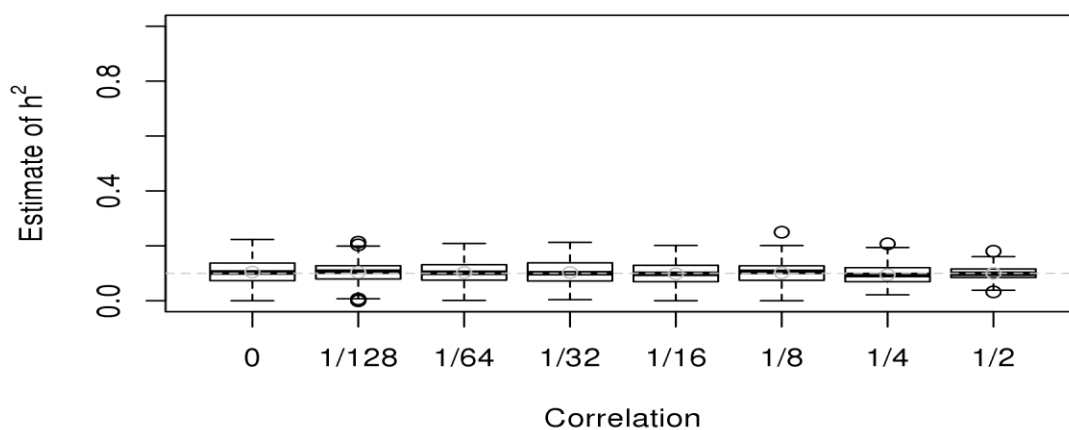

77

**b**

**50 casual SNPs**

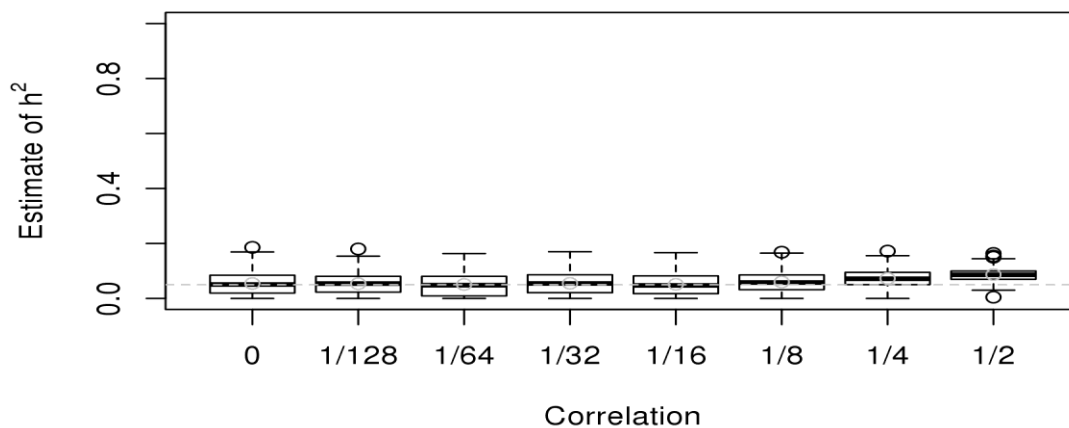

78

c

### 100 casual SNPs

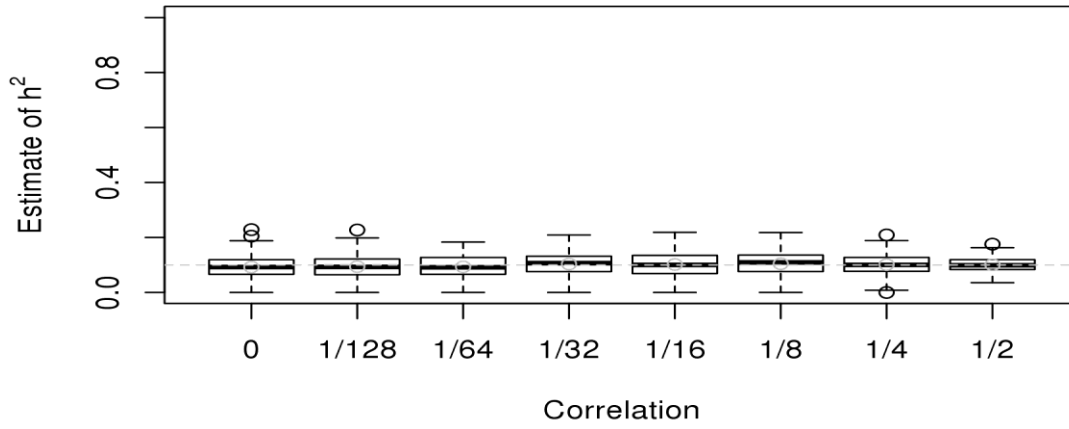

79

d

### 50 casual SNPs

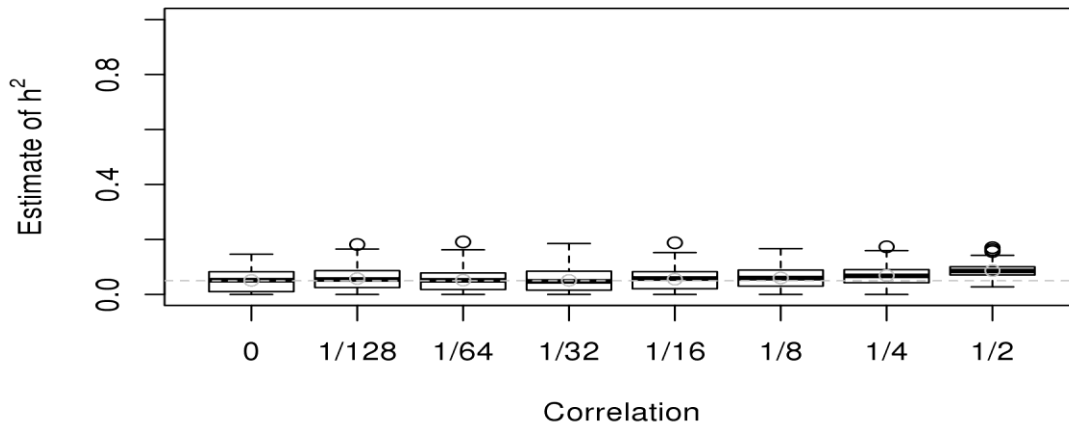

80

81

82

83

84

85

86

87

88

89

90

91

92

93

94 **Figure S4 Heritability estimates for various levels of genetic correlation with 10,000**  
 95 **individuals when  $h^2$  was set at 0.3.** We generated 5,000 pairs of individuals with 100,000  
 96 SNPs, and each box-plot was generated with results from 200 replicates. The dashed  
 97 horizontal line indicates the proportion of the total phenotypic variance explained by the  
 98 SNPs used for calculating the GRM, and the estimates of heritability with GCTA are  
 99 plotted against the correlation between family members. In **a**, all causal variants were  
 100 generated from  $U(0, 0.1)$  and 100 causal SNPs were used to estimate the GRM, in **b**, all  
 101 causal variants were generated from  $U(0, 0.1)$  and 50 causal SNPs were used, in **c**, all  
 102 causal variants were generated from  $U(0.1, 0.4)$  and 100 causal SNPs were used, and in **d**,  
 103 all causal variants were generated from  $U(0.1, 0.4)$  and 50 causal SNPs were used. The  
 104 horizontal dotted line indicates the relative proportion of variance explained by the SNPs.

**a**

**100 casual SNPs**

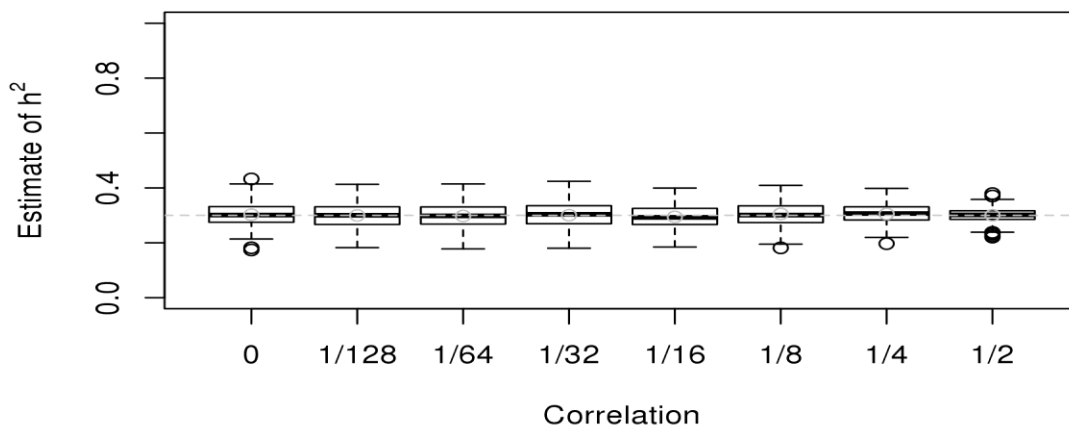

**b**

**50 casual SNPs**

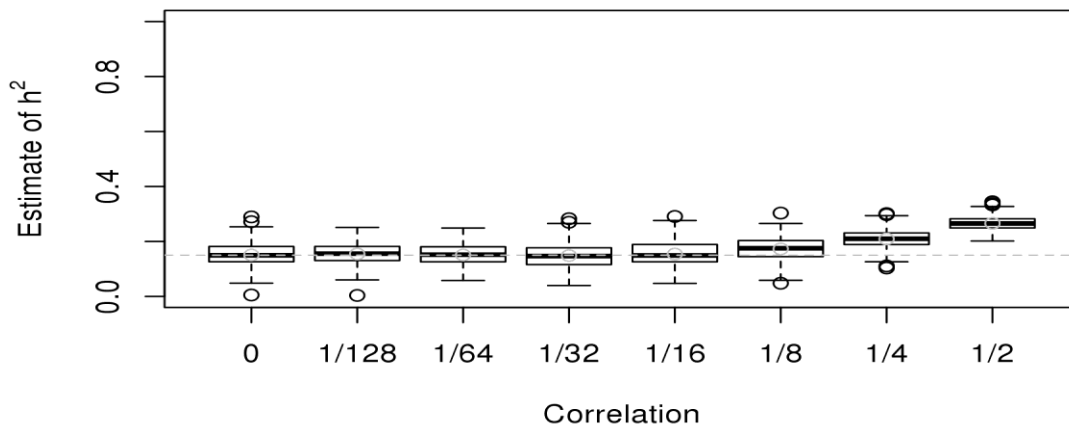

105

106



c

### 100 casual SNPs

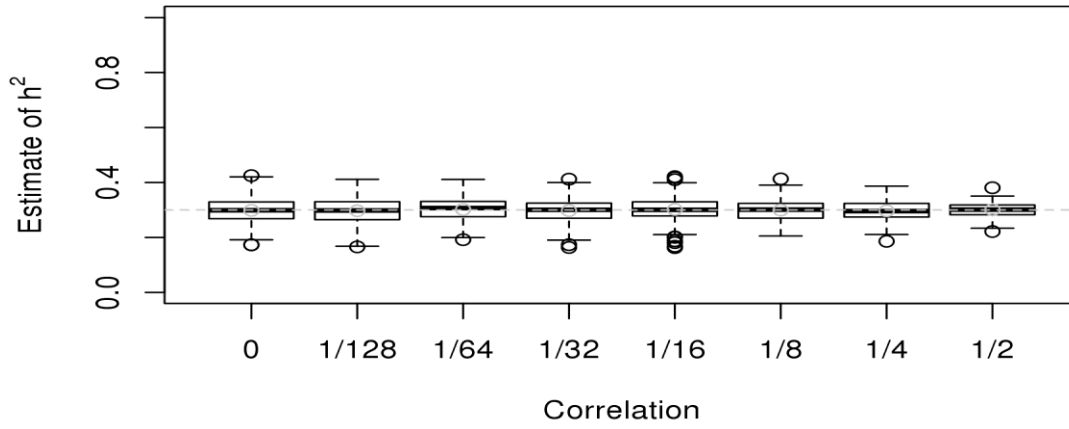

107

d

### 50 casual SNPs

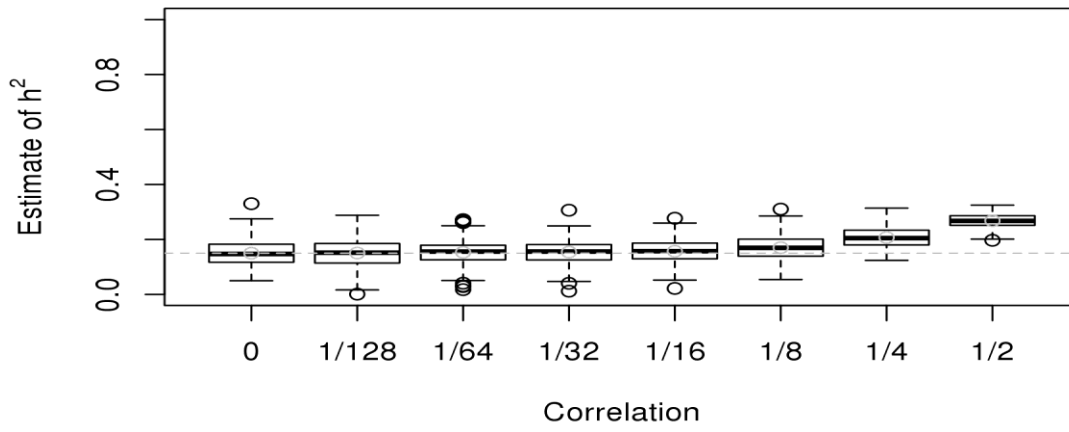

108

109

110

111

112

113

114

115

116

117

118

119

120

121

122 **Figure S5 Heritability estimates for various levels of genetic correlation with 10,000**  
 123 **individuals when  $h^2$  was set at 0.7.** We generated 5,000 pairs of individuals with 100,000  
 124 SNPs, and each box-plot was generated with results from 200 replicates. The dashed  
 125 horizontal line indicates the proportion of the total phenotypic variance explained by the  
 126 SNPs used for calculating the GRM, and the estimates of heritability with GCTA are  
 127 plotted against the correlation between family members. In **a**, all causal variants were  
 128 generated from  $U(0, 0.1)$  and 100 causal SNPs were used to estimate the GRM, in **b**, all  
 129 causal variants were generated from  $U(0, 0.1)$  and 50 causal SNPs were used, in **c**, all  
 130 causal variants were generated from  $U(0.1, 0.4)$  and 100 causal SNPs were used, and in **d**,  
 131 all causal variants were generated from  $U(0.1, 0.4)$  and 50 causal SNPs were used. The  
 132 horizontal dotted line indicates the relative proportion of variance explained by the SNPs.

**a**

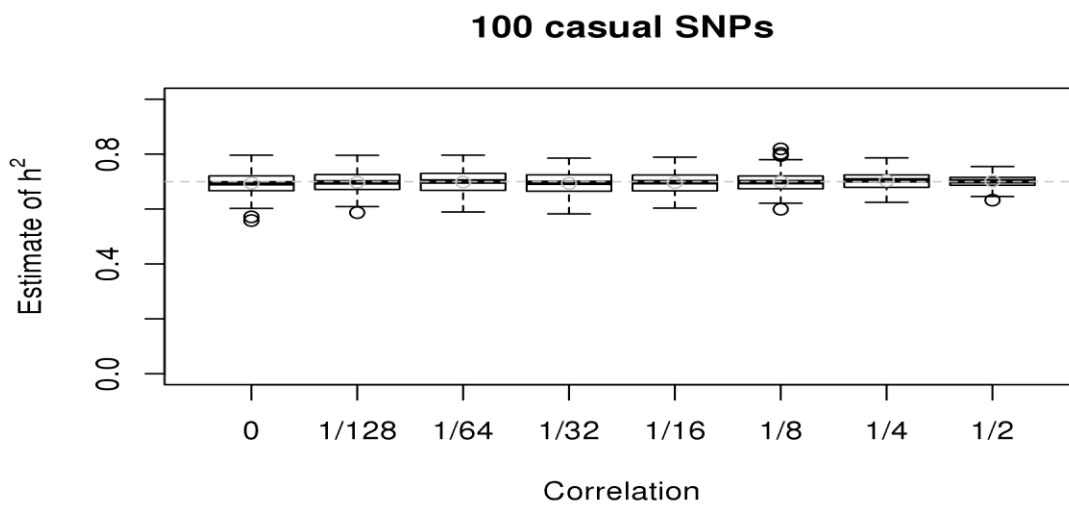

133

**b**

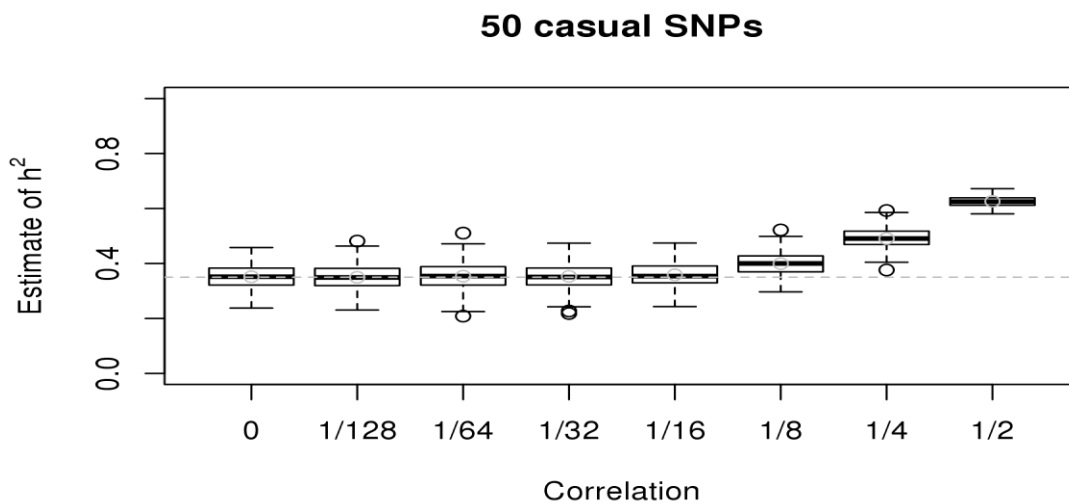

134

c

### 100 casual SNPs

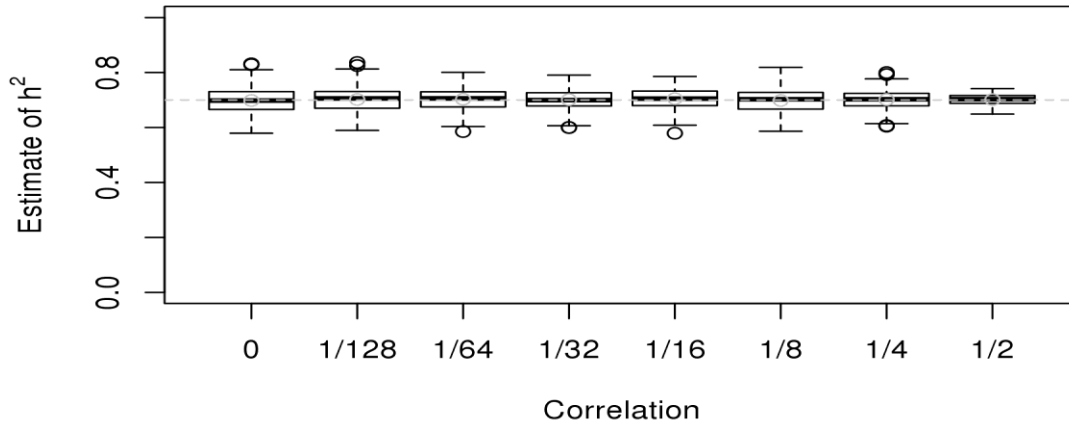

135

d

### 50 casual SNPs

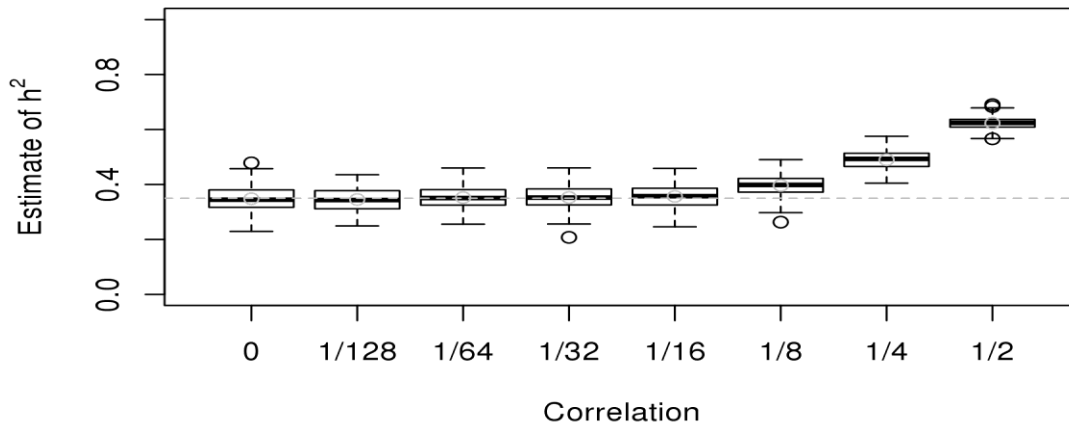

136

137

138

139

140

141

142

143

144

145

146

147

148

149

150 **Figure S6 Heritability estimates for various levels of genetic correlation with 10,000**  
151 **individuals when  $h^2$  was set at 0.9.** We generated 5,000 pairs of individuals with 100,000  
152 SNPs, and each box-plot was generated with results from 200 replicates. The dashed  
153 horizontal line indicates the proportion of the total phenotypic variance explained by the  
154 SNPs used for calculating the GRM, and the estimates of heritability with GCTA are  
155 plotted against the correlation between family members. In **a**, all causal variants were  
156 generated from  $U(0, 0.1)$  and 100 causal SNPs were used to estimate the GRM, in **b**, all  
157 causal variants were generated from  $U(0, 0.1)$  and 50 causal SNPs were used, in **c**, all  
158 causal variants were generated from  $U(0.1, 0.4)$  and 100 causal SNPs were used, and in **d**,  
159 all causal variants were generated from  $U(0.1, 0.4)$  and 50 causal SNPs were used. The  
160 horizontal dotted line indicates the relative proportion of variance explained by the SNPs.

**a**

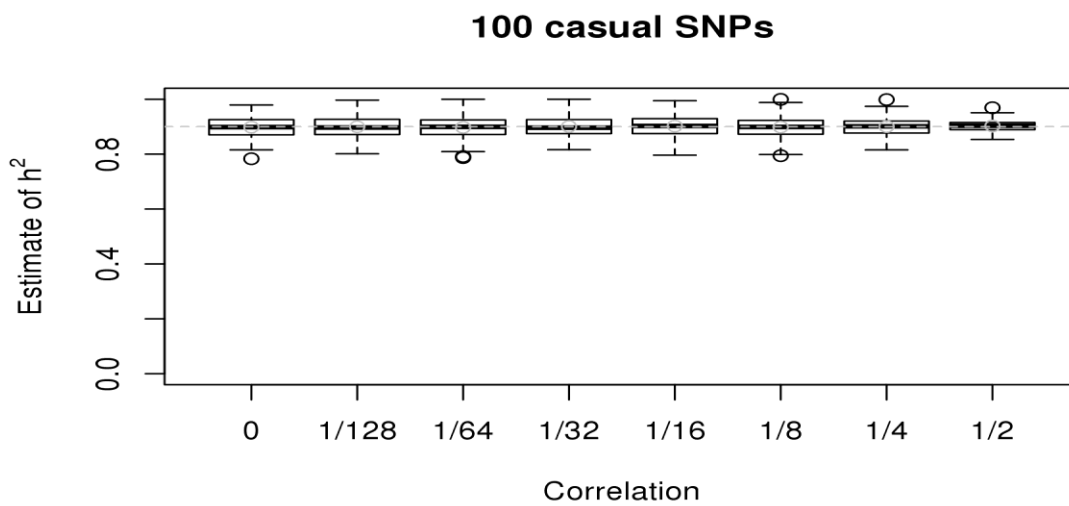

161

**b**

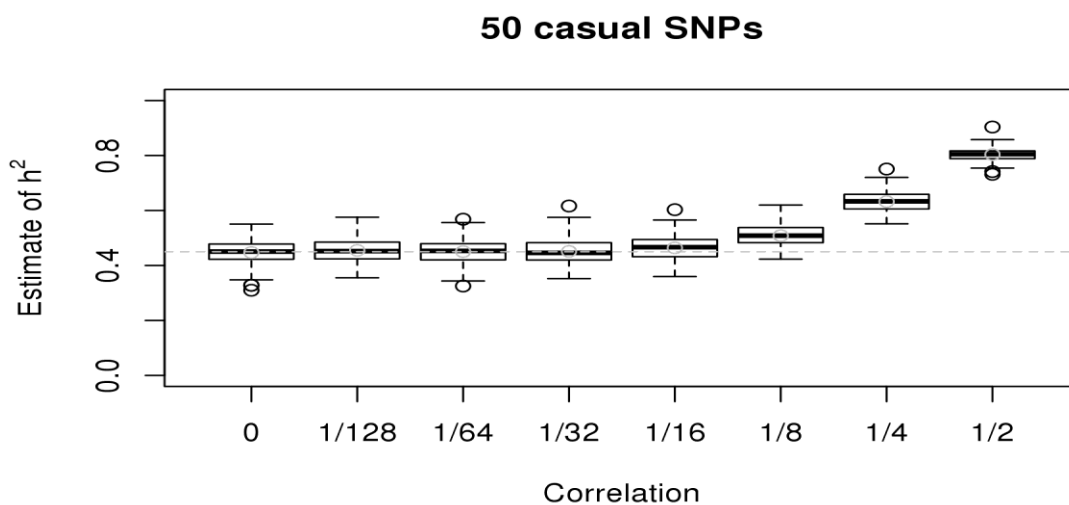

162

c

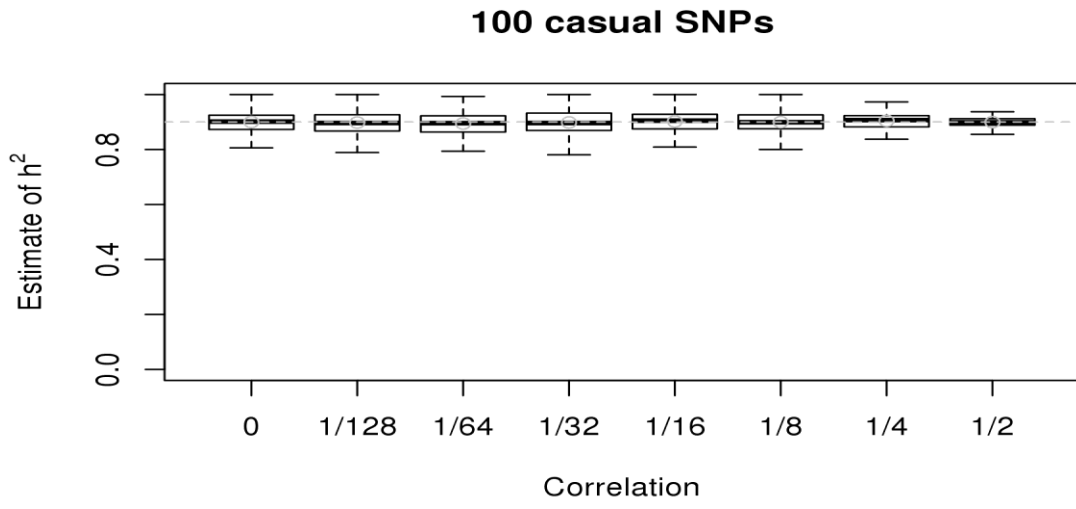

163

d

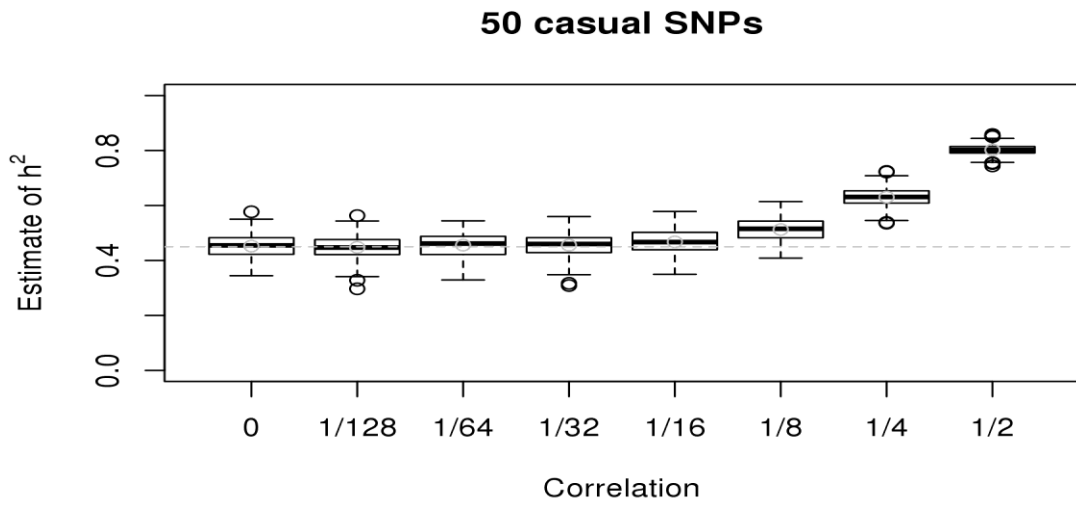

164
